# Supplementary material for: Heterogeneous Fenton-like activity of novel metallosalophen magnetic nanocomposites: significant anchoring group effect
Source: Royal Society of Chemistry journal article supplement (doi:10.1039/c9ra05097c), 2019-01-01
Supplement: c9ra05097c1.pdf [file c9ra05097c1.pdf]

## Supporting information

# Heterogeneous Fenton-like activity of novel metallosalophen magnetic nanocomposites: Significant anchoring group effect

Narges Keikha, Abdolreza Rezaeifard<sup>□</sup> and Maasoumeh Jafarpour<sup>□</sup>

### Experimental

#### Remarks

All chemicals were analytical grade reagents and used without further purification. FT-IR spectra were recorded on a Nicolet-Impact 400D spectrometer in the range of 400-4000  $\text{cm}^{-1}$ . Thermogravimetric analysis (TGA) of powders carried out on Shimadzu 50 under the air flow at a uniform heating rate of 10  $^{\circ}\text{C min}^{-1}$  in the range of 30-800  $^{\circ}\text{C}$ . Transmission electron microscopy (TEM) measurements were obtained by a 906 E instrument (Zeiss, Jena, Germany). The Fe and Mn content of the catalyst was measured by an inductively coupled plasma optical emission spectrometry (ICP-OES), using a VISTA-PRO ICP analyzer. UV-Vis spectra were recorded on a V670 JASCO spectrophotometer. Magnetic properties measurements were performed using vibrating sample magnetometer (VSM, Lake Shore Cryotronics 7407). Powder X-ray diffraction (XRD) was performed on a Bruker D8-advance X-ray diffractometer with Cu Ka ( $\lambda = 1.5406 \text{ \AA}$ ) radiation. EDX elemental analysis performed by Scanning Electron Microscope TESCAN Vega Model with EDX detector. GC-MS analysis was performed by Agilent 5975c.

#### The Preparation of $\gamma\text{-Fe}_2\text{O}_3$ (MNP)

$\gamma\text{-Fe}_2\text{O}_3$  MNPs were synthesized by a chemical co-precipitation technique reported previously.<sup>1,2</sup>  $\text{FeCl}_2 \cdot 4\text{H}_2\text{O}$  (1.99 g) and  $\text{FeCl}_3 \cdot 6\text{H}_2\text{O}$  (3.25 g) were dissolved in deionized water (30 mL) under Ar atmosphere at room temperature. An  $\text{NH}_4\text{OH}$  solution (0.6 M, 200 mL) was then added dropwise (drop rate = 1  $\text{mL min}^{-1}$ ) to the stirring mixture at room temperature to reach the reaction pH to 11. The resulting black dispersion was continuously stirred for 1 h at room temperature and then heated to reflux for 1 h to yield a brown dispersion. The magnetic nanoparticles were then

separated by an external magnet and washed with deionized water until it was neutralized. The as-synthesized sample was heated at  $2\text{ }^{\circ}\text{C min}^{-1}$  up to  $250\text{ }^{\circ}\text{C}$  and then kept in the furnace for 3 h to give a reddish-brown powder.

### **Synthesis of silica-coated maghemite nanoparticles (SMNP)**

The silica-coated maghemite nanoparticles were synthesized with minor modifications of literature.<sup>3</sup> 1.7 g of synthesized  $\text{Fe}_2\text{O}_3$ , suspended in 80 mL methanol and 20 mL deionized water and sonicated for 1 h at  $40\text{ }^{\circ}\text{C}$ . Then aqueous ammonia (25%, 1.8 mL) was added slowly over 10 min and the mixture was heated at  $40\text{ }^{\circ}\text{C}$  for 30 min under mechanical stirrer. Then 1 mL of tetraethylorthosilicate (TEOS) was added slowly to the mixture and then stirred mechanically for 24 h at room temperature. The iron oxide nanoparticles with a thin layer of silica ( $\text{Fe}_2\text{O}_3@\text{SiO}_2$ ) were separated by an external magnet and washed two times with ethanol and diethyl ether and dried under vacuum.

### **Preparation of Fe(III)SalophenCl complex**

Fe(III)SalophenCl was prepared as previously described.<sup>4</sup> In brief, Salophen ligand was synthesized by dropwise adding of two equivalents of 2-hydroxybenzaldehyde (20 mmol) in 25 mL ethanol to one equivalent of 1,2-phenyldiamine (10 mmol) in 25 mL ethanol and refluxing for 1 h that resulted in the yellow precipitate of Salophen. The precipitate cooled down to room temperature and filtered and washed with cold methanol and water. The  $\text{FeCl}_3 \cdot 6\text{H}_2\text{O}$  (0.3 mmol) was mixed with the equivalent amount of Salophen in 10 mL ethanol and heated to  $70\text{ }^{\circ}\text{C}$  for 1 h under argon atmosphere. This resulted solution was cooled down to room temperature and filtrated off and washed with cool ethanol and dried under vacuum with  $\text{P}_2\text{O}_5$ .

### **Preparation of Mn(III)SalophenCl complex**

Mn(III)SalophenCl synthesized according to the method described previously in the literature.<sup>5</sup> 0.3 mmol of Salophen ligand is in 10 mL hot absolute ethanol. Then Solid  $\text{Mn}(\text{OAc})_2 \cdot \text{H}_2\text{O}$  (0.3 mmol) is added in one portion and the solution is refluxed for 1 h. Approximately 1 mmol of solid LiCl are then added and, the mixture is heated to reflux for an additional 0.5 h. Cooling the mixture

to 0 °C affords the Mn(III) complex as dark brown crystals that are washed thoroughly with cool ethanol and H<sub>2</sub>O and dried under vacuum.

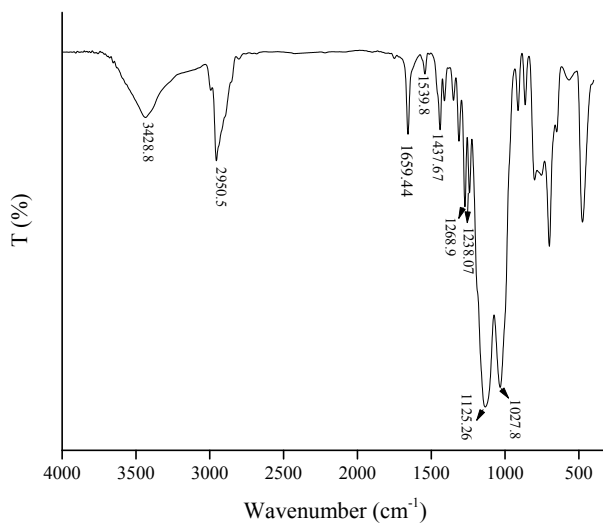

**Fig. S1.** FT-IR spectra of SAPy

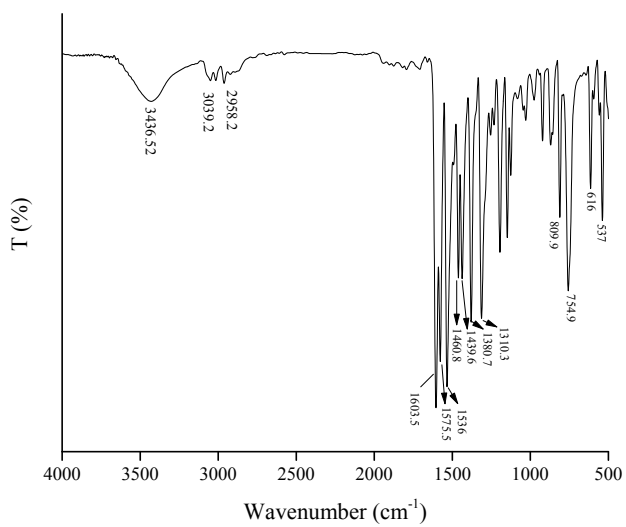

**Fig. S2.** FT-IR spectra of Fe(III)SalophenCl

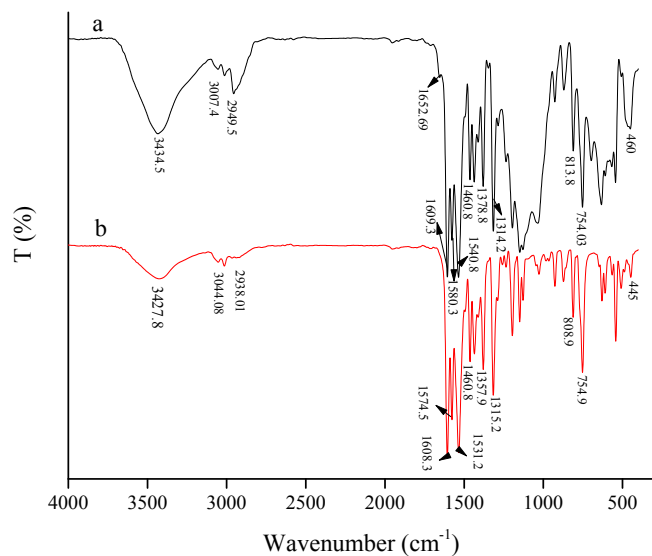

**Fig. S3.** FT-IR spectra of (a) SMNP@SAPy/MnSal, (b) Mn(III)(Salophen)Cl .

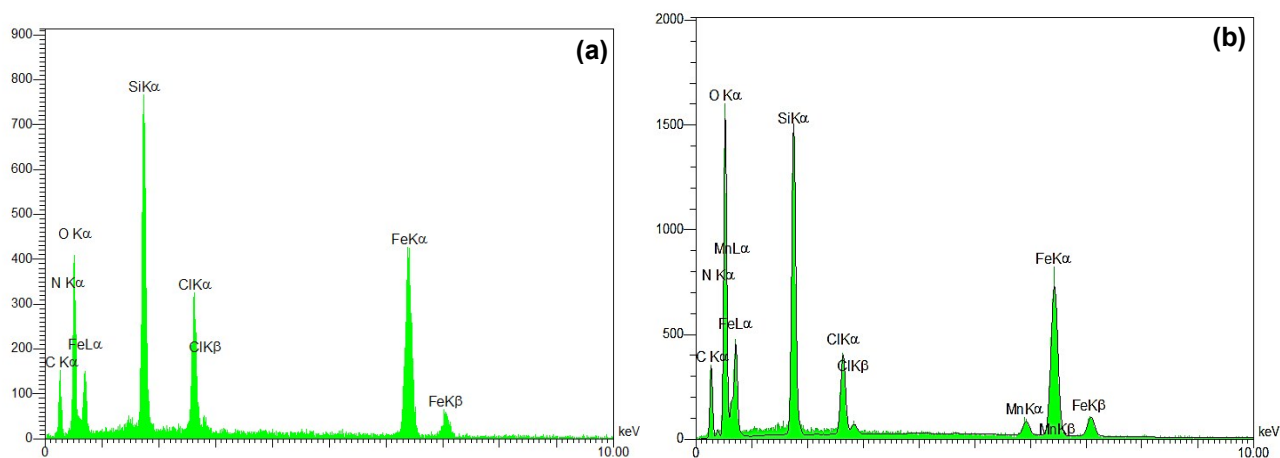

**Fig. S4.** EDS Spectrum of the as-prepared (a) SMNP@SAPy/FeSal, (b) SMNP@SAPy/MnSal .

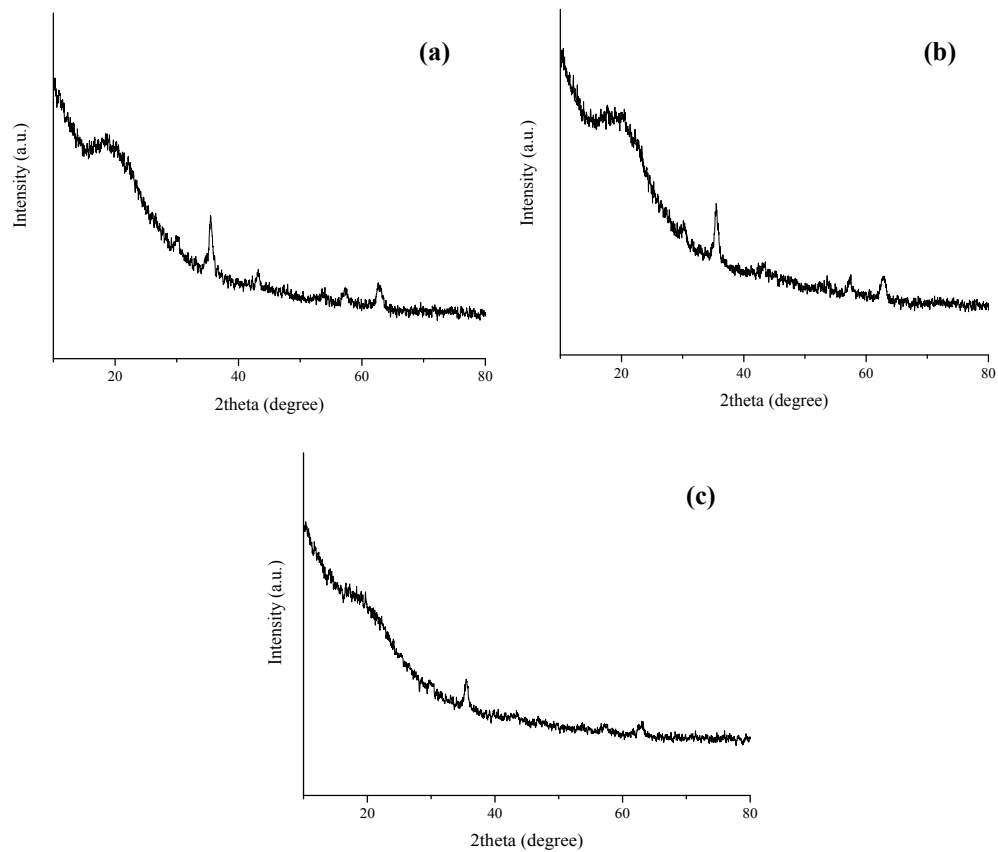

**Fig. S5.** XRD pattern of (a) SMNP@SAPy, (b) SMNP@SAPy/FeSal and (c) SMNP@SAPy/MnSal .

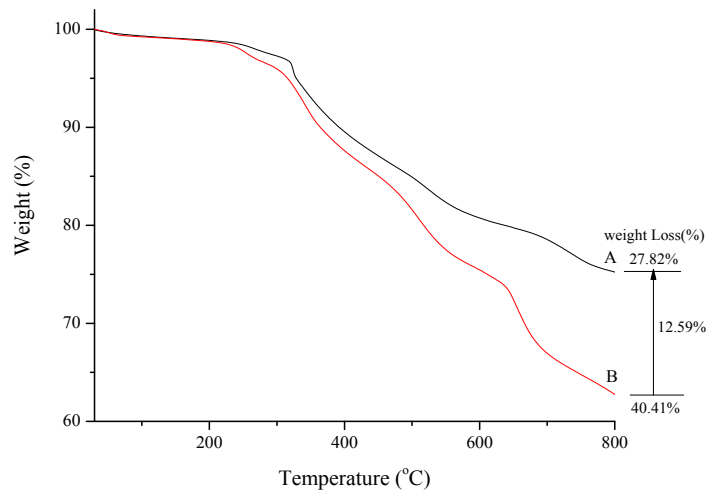

**Fig. S6.** TGA thermograms of SMNP@SAPy/MnSal (B) in comparison with SMNP@SAPy (A) .

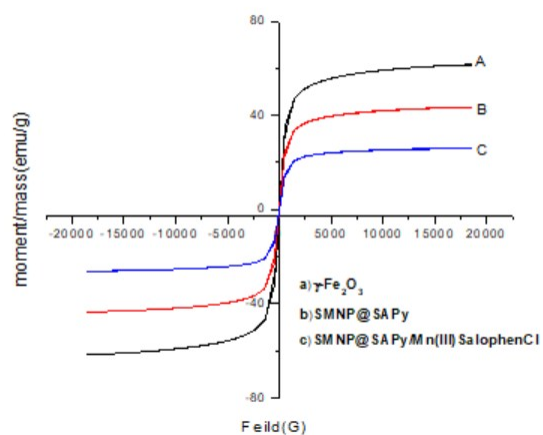

**Fig. S7.** Hysteresis loops of the as-synthesized (a) bare  $\gamma\text{-Fe}_2\text{O}_3$ , (b) SMNP@SAPy, and (c) SMNP@SAPy/MnSal, at 298 K.

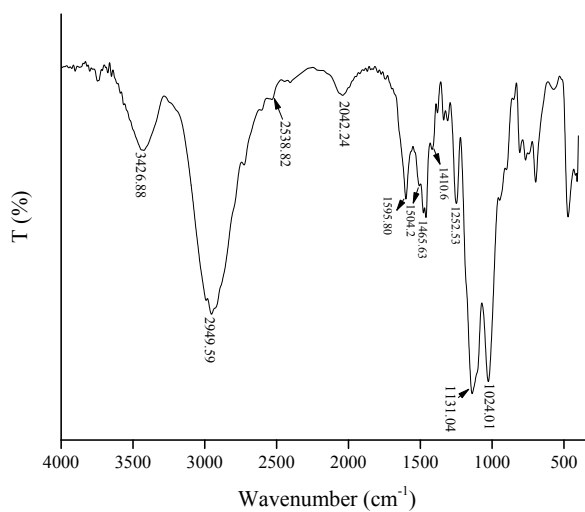

**Fig. S8.** FT-IR spectra of SAET

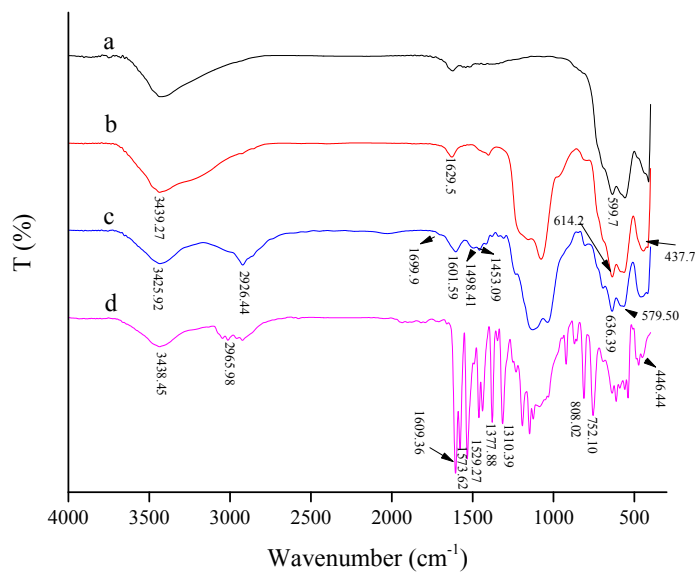

**Fig. S9.** FT-IR spectra of MNP (a), SMNP (b), SMNP@SAET (c) and SMNP@SAET/FeSal (d).

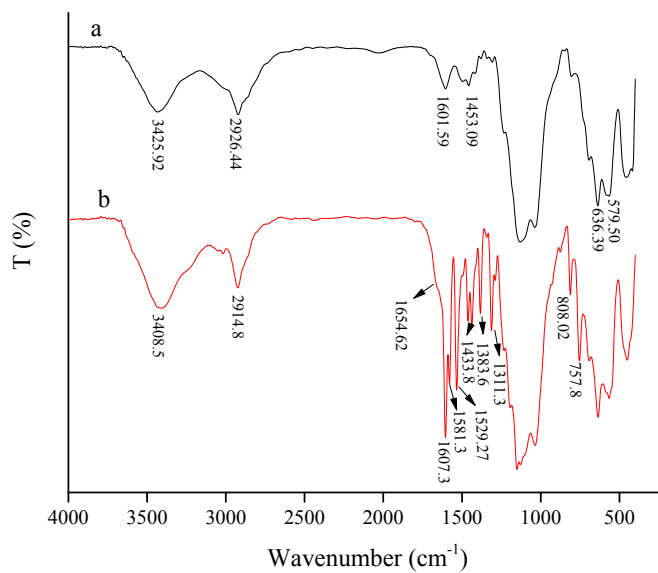

**Fig. S10.** FT-IR spectra of SMNP@SAET/MnSal

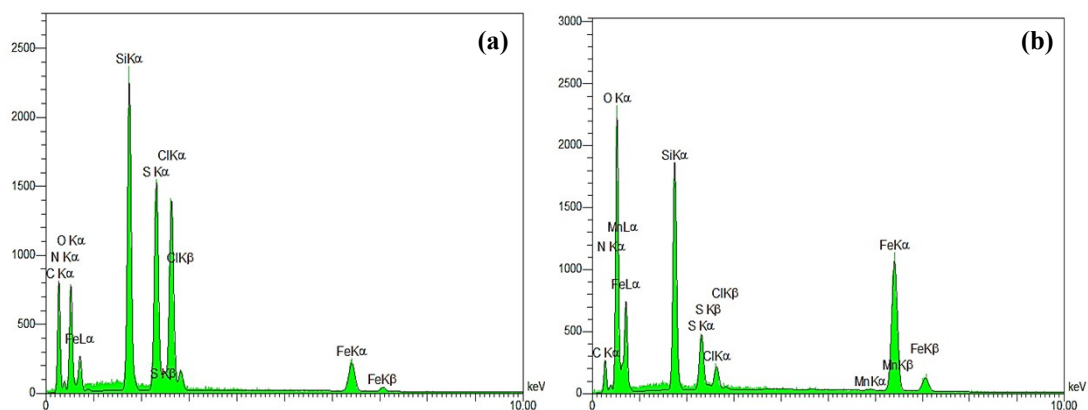

**Fig. S11.** EDS Spectrum of the as-prepared (a) SMNP@SAET/FeSal, (b) SMNP@SAET/MnSal.

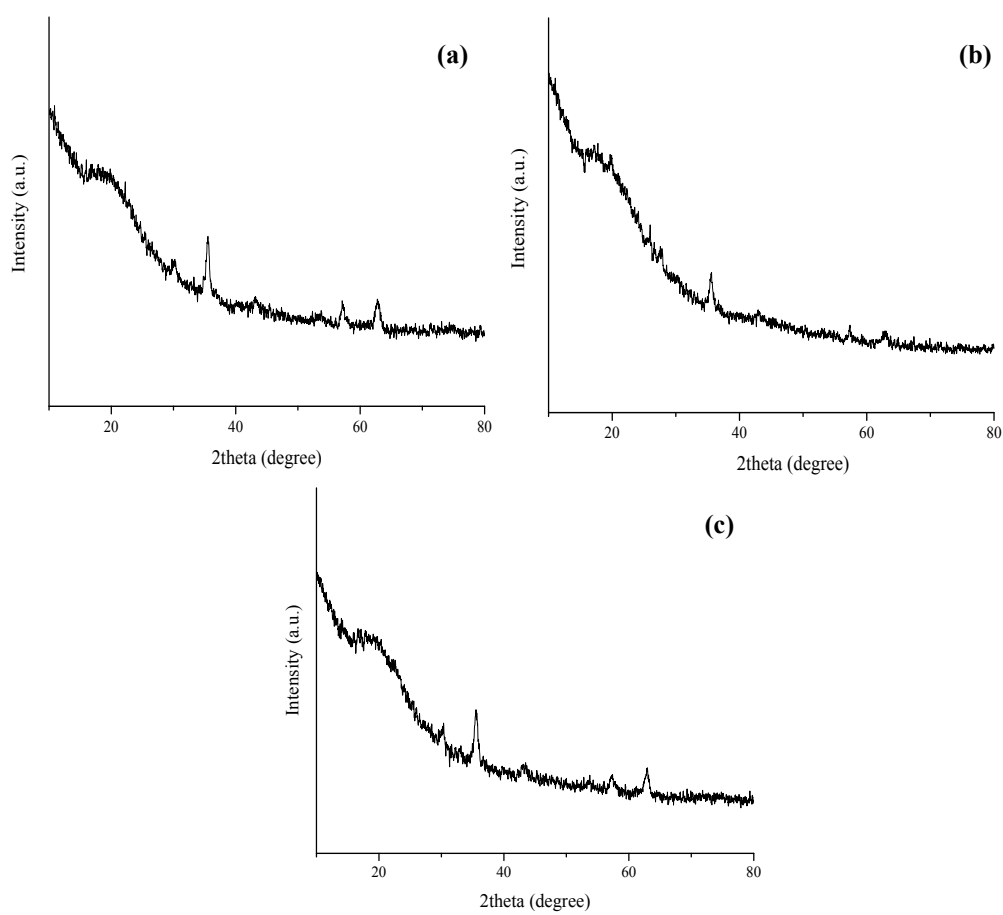

**Fig. S12.** XRD pattern of (a) SMNP@SAET, (b) SMNP@SAET/FeSal, and (c) SMNP@SAET/MnSal .



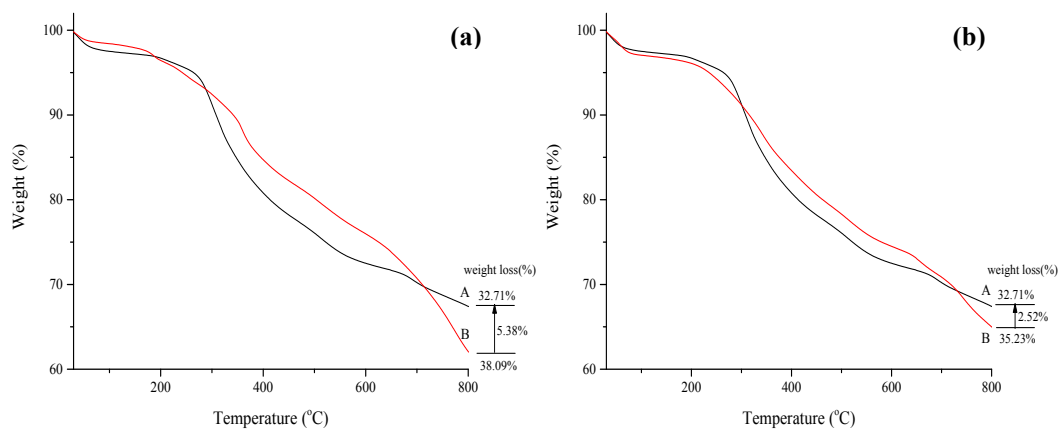

**Fig. S13.** TGA thermograms of (a,B) SMNP@SAET/FeSal and (b,B) SMNP@SAET/MnSal in comparison with SMNP@SAET (A in a,b).

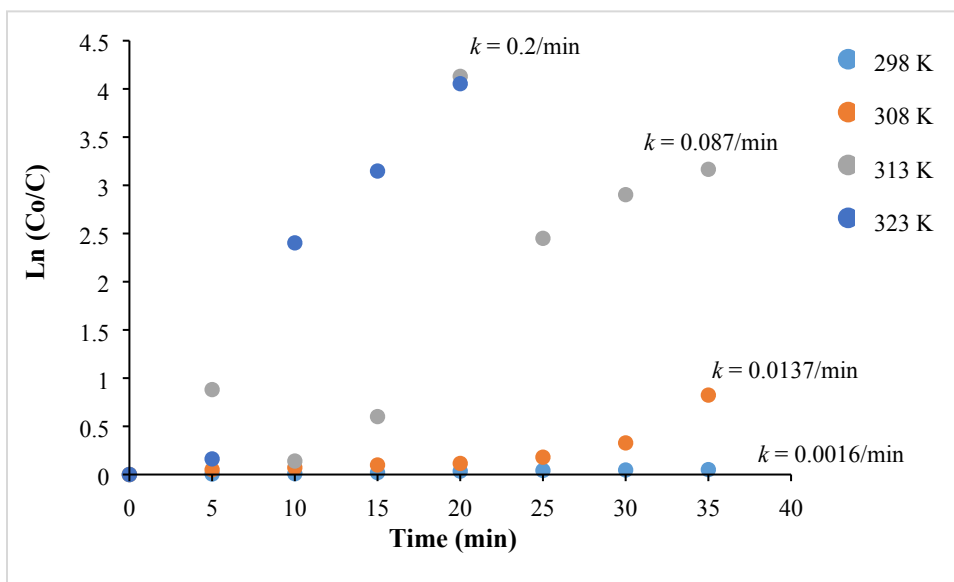

**Fig. S14.**  $\ln[\text{RhB}]_o/[\text{RhB}]_i$  as a function of reaction time for  $T = 298, 308, 313, 323 \text{ K}$ .

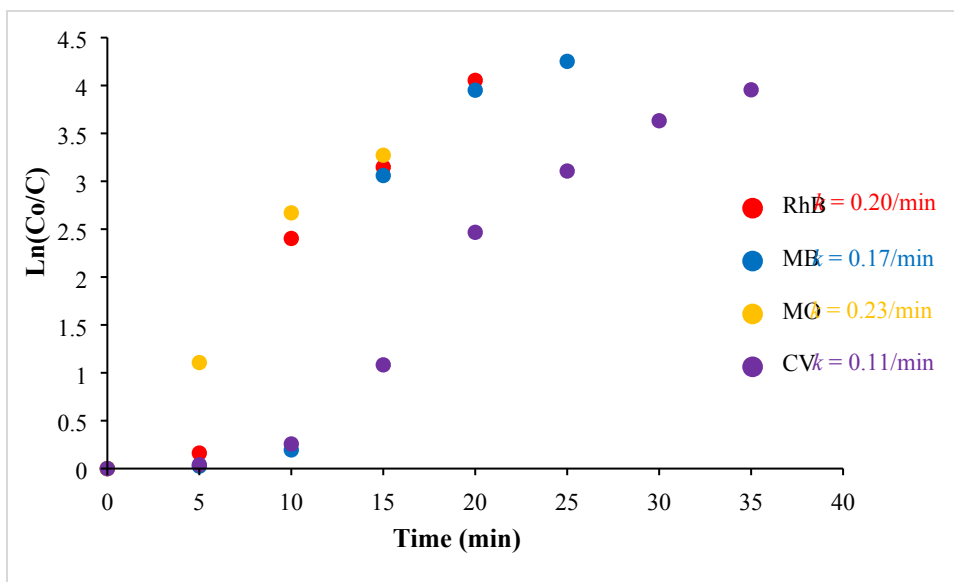

**Fig. S15.**  $\ln[C]_0/[C]_t$  as a function of reaction time for RhB, methylene blue (MB), methyl orange (MO) and crystal violet (CV) at  $T = 323$  K.

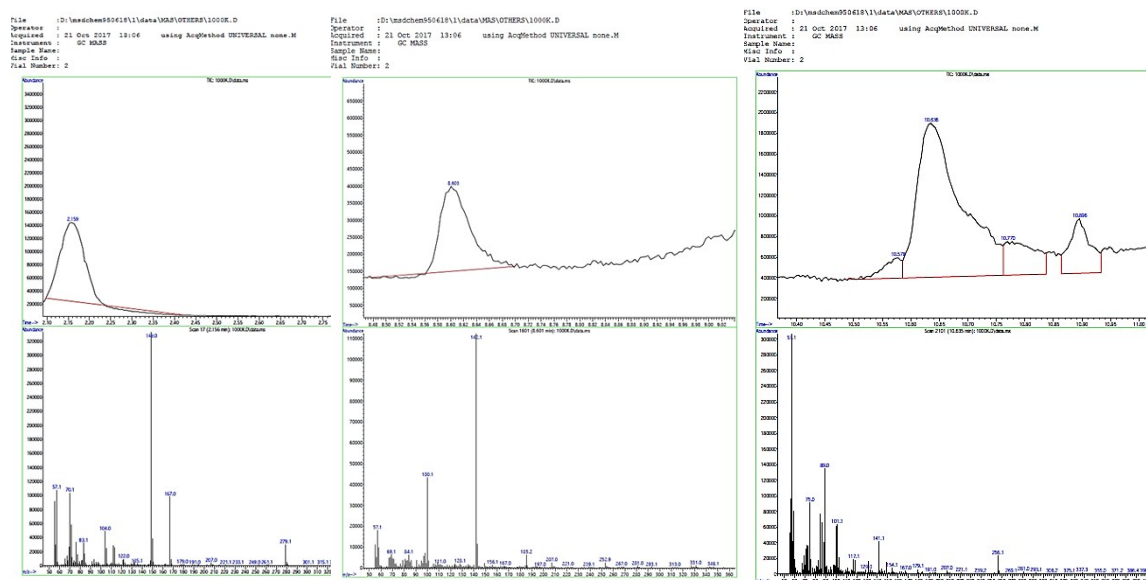

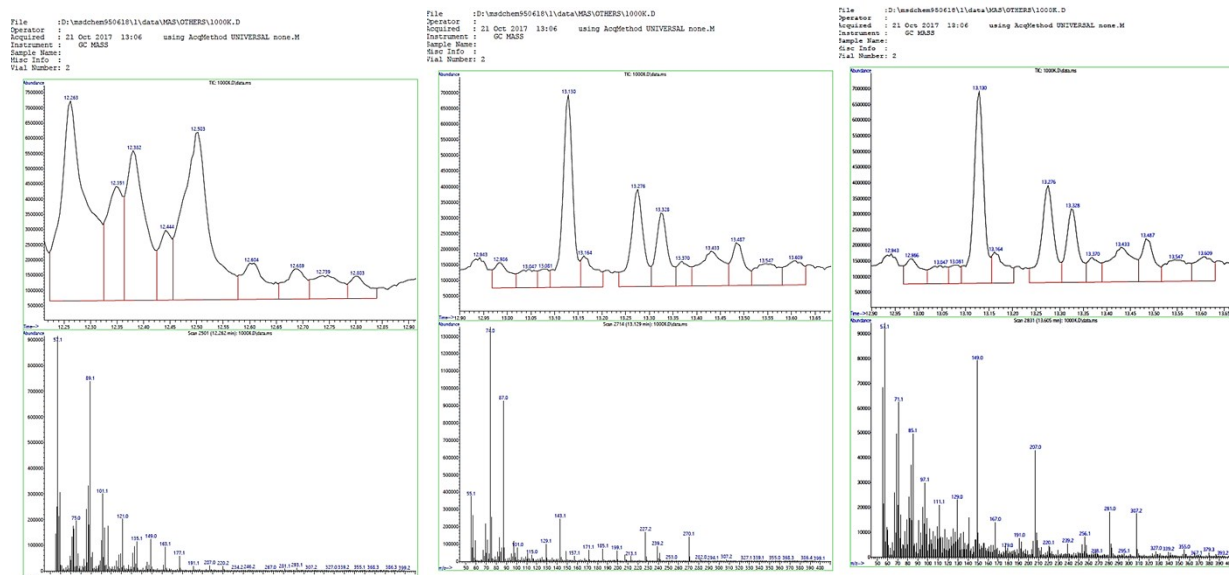

Fig. S16. GC trace and MS spectra of intermediates of RhB degradation in the present system.

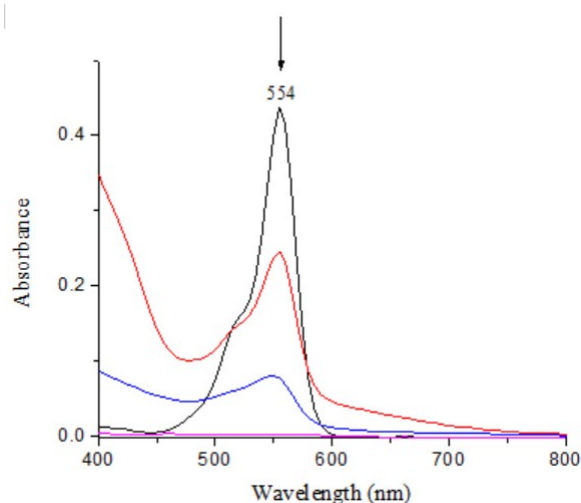

Fig. S17. UV-Vis spectral changes of RhB in the present system.

## References

- 1 R. Massart, E. Dubois, V. Cabuil and E. Hasmonay, *J. Magn. Magn. Mater.*, 1995, **149**, 1-5.
- 2 B. Z. Tang, Y. Geng, J. W. Y. Lam, B. Li, X. Jing, X. Wang, F. Wang, A. B. Pakhomov and X. X. Zhang, *Chem. Mater.*, 1999, **11**, 1581-1589.
- 3 C. Pacurariu, E. A. Taculescu, R. Ianoș, O. Marinică, C. V. Mihali and V. Socoliuc, *Ceram. Int.*, 2015, **41**, 1079-1085.
- 4 Y. S. Sharma and P. Mathur, *Transit. Metal Chem.*, 1994, **19**, 311-314.
- 5 W. Zhang and E. N. Jacobsen, *J. Org. Chem.*, 1991, **56**, 2296-2298.
